# Supplementary material for: Thermal conversion of black liquor solids to monomeric aromatic hydrocarbons based on synergistic catalysis by Na compounds and HZSM-5
Source: Royal Society of Chemistry journal article supplement (doi:10.1039/d2se01020h), 2022-01-01
Supplement: d2se01020h1.pdf [file d2se01020h1.pdf]

Thermal conversion of black liquor solids to monomeric aromatic hydrocarbons based  
on synergistic catalysis by Na compounds and HZSM-5

Guozhang Chang<sup>a,b</sup>, Juzheng Wang<sup>b</sup>, Weiwei Cui<sup>a,b\*</sup>, Cuiping Wang<sup>a,b</sup>, Jian Zhang<sup>a,b</sup>

*<sup>a</sup> Institute of Yellow River Delta Earth Surface Processes and Ecological Integrity, Shandong  
University of Science and Technology, Qingdao 266590, China*

*<sup>b</sup> College of Civil Engineering and Architecture, Shandong University of Science and  
Technology, Qingdao 266590, China*

---

\*Corresponding author.

*E-mail:* cuiweiwei@sdust.edu.cn.

*Address:* 579<sup>th</sup> Qianwangang Rd., Huangdao District, Qingdao 266590, China

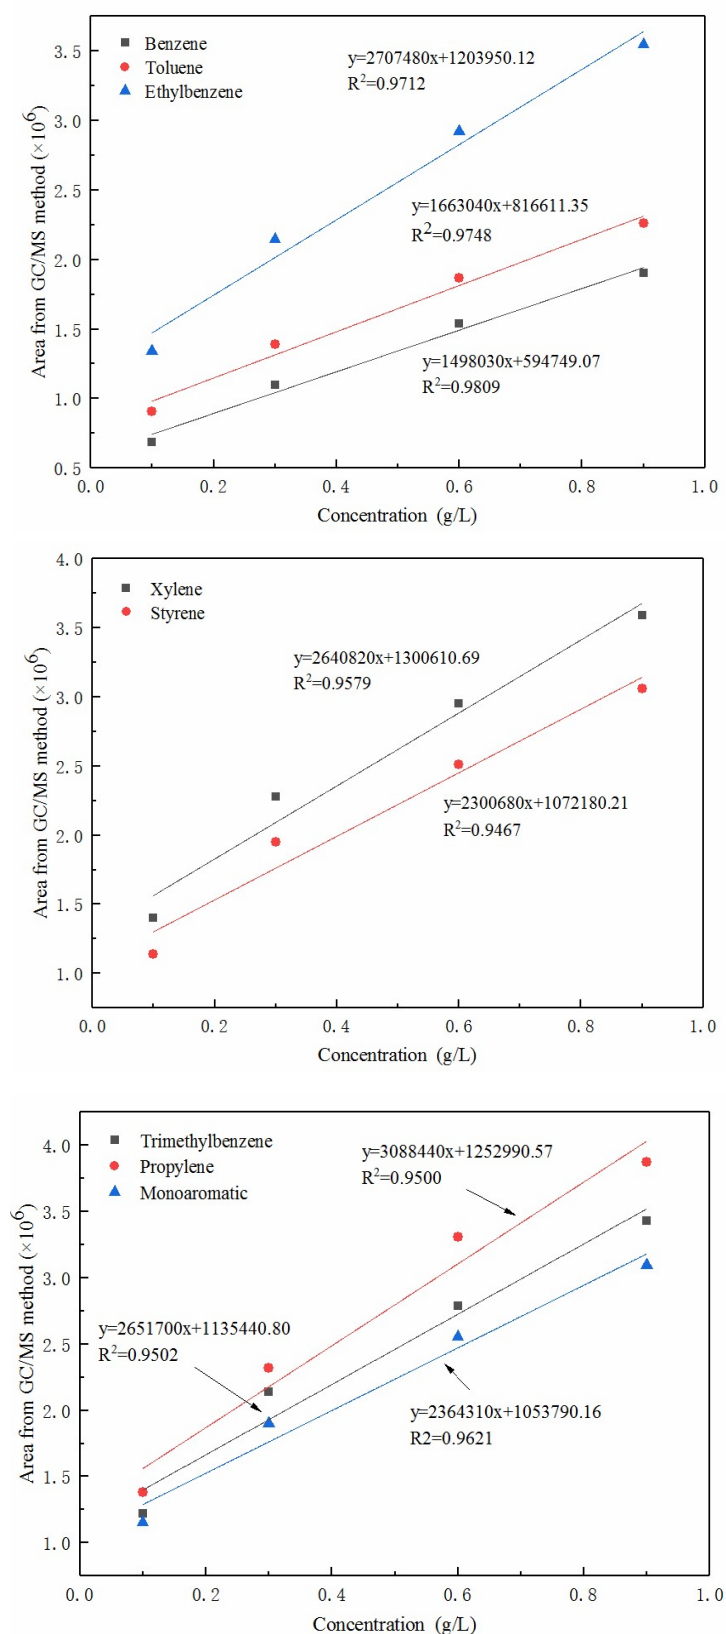

Fig. S1. Functional relationship between GC/MS area and concentration for each monomeric aromatic hydrocarbon

**Table S1** The Fitting formulas of the calibration curves

|                  | Fitting formula                    | Coefficients, R <sup>2</sup> |
|------------------|------------------------------------|------------------------------|
| benzene          | $y = 257076153.85 x + 1544585.50$  | 0.999                        |
| toluene          | $y = 394153088.75 x + 4864455.81$  | 0.998                        |
| ethylbenzene     | $y = 467232880.17 x + 7611739.64$  | 0.988                        |
| xylene           | $y = 336429742.20 x + 11246115.68$ | 0.994                        |
| styrene          | $y = 382675702.90 x + 7314938.69$  | 0.998                        |
| phenylpropane    | $y = 374836302.88 x + 12197286.50$ | 0.995                        |
| trimethylbenzene | $y = 395909439.02 x + 9806035.53$  | 0.997                        |
| naphthalene      | $y = 323870297.12 x + 7510248.55$  | 0.997                        |
